# Supplementary material for: Auditory cortex controls sound-driven innate defense behaviour through corticofugal projections to inferior colliculus
Source: PubMed Central journal article supplement (PMC4467028; doi:10.1038/ncomms8224), 2015-06-11
Supplement: NIHMS683295-supplement-1.pdf [file NIHMS683295-supplement-1.pdf]

4 videos are included for different experimental conditions, soundtracks were included to indicate experimental conditions of noise stimulations.

1. Freely moving animal in response to noise (see Fig. 1a)
2. Head-fixed animal in response to noise (see Fig. 1e)
3. Head-fixed animal in response to light activation of corticofugal terminals in IC cortex without sound (see Fig. 3c)
4. Head-fixed animal in response to noise in one trial and noise+ light inactivation of corticofugal terminals in IC cortex in a subsequent trial (see Fig. 3h)

## Freely moving animal in response to noise

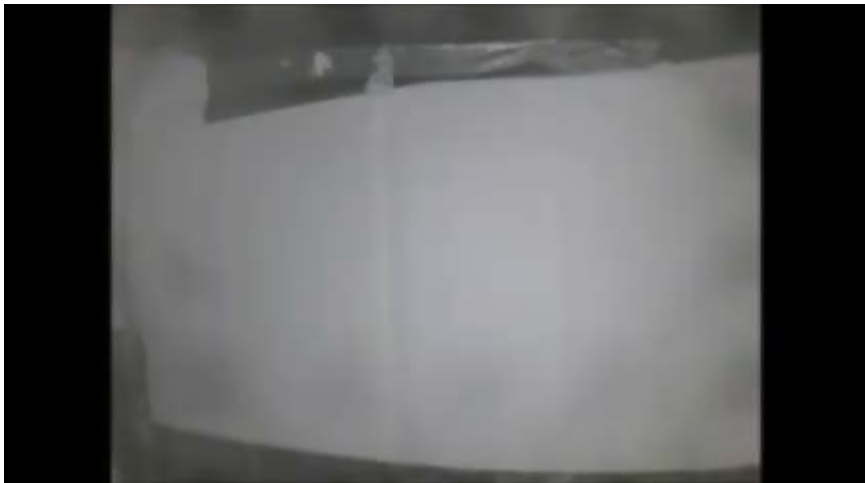

Filename: 1.free moving.wmv

# Head-fixed animal in response to noise

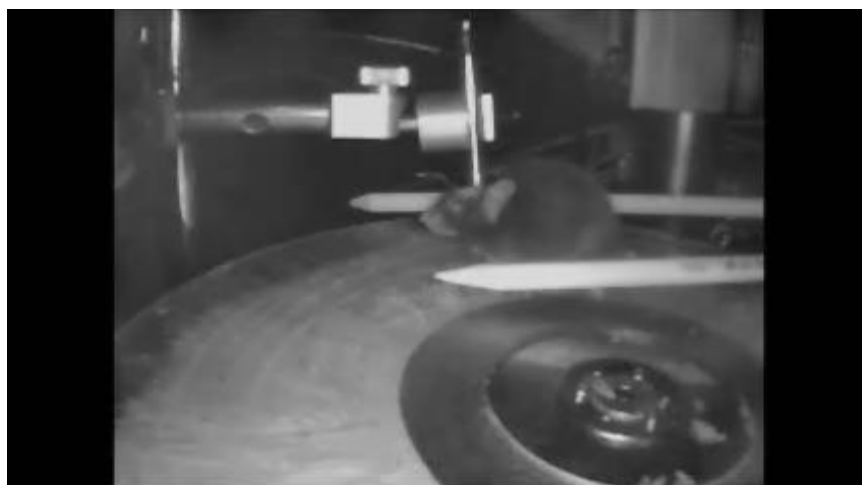

Filename: 2. head-fixed noise only.wmv

Head-fixed animal in response to light activation of corticofugal terminals in IC cortex without sound

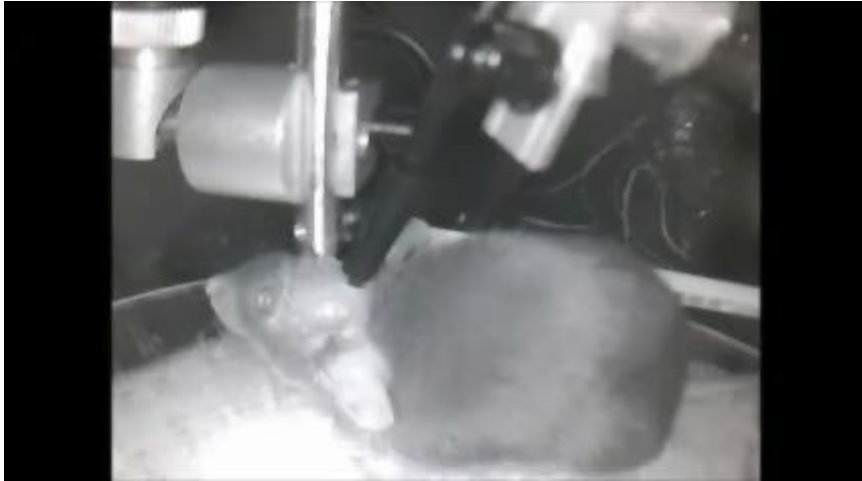

Filename: 3.ic chr2.wmv

Head-fixed animal in response to noise in one trial  
and noise+ light inactivation of corticofugal  
terminals in IC cortex in a subsequent trial

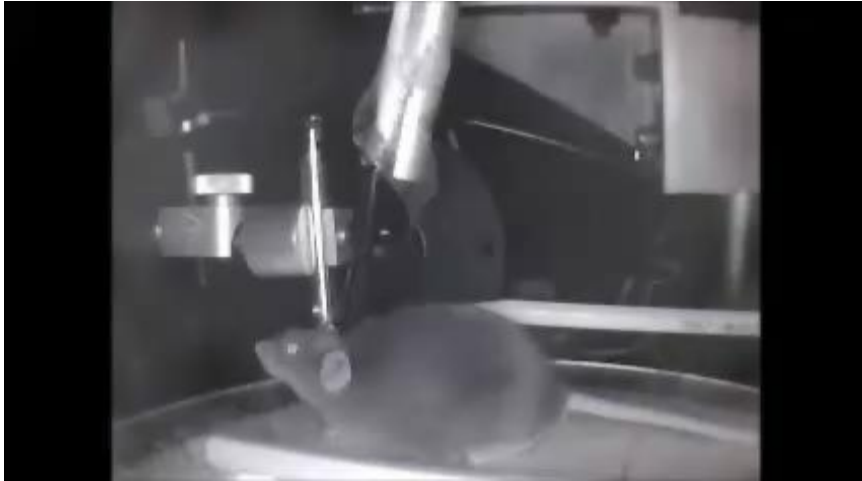

Filename: 4.ic archt -noise.wmv
